# Supplementary material for: Challenging breaking thermoelectric performance limits by twistronics
Source: Royal Society of Chemistry journal article supplement (doi:10.1039/d3ta02283h), 2023-01-01
Supplement: d3ta02283h1.pdf [file d3ta02283h1.pdf]

## Challenging breaking thermoelectric performance limits by twistronics

Jizhe Song,<sup>a</sup> Mengtao Sun<sup>\*a</sup>

*a School of Mathematics and Physics, Beijing Advanced Innovation Center for Materials Genome Engineering, University of Science and Technology Beijing, Beijing 100083, China. E-mail: mengtaosun@ustb.edu.cn*

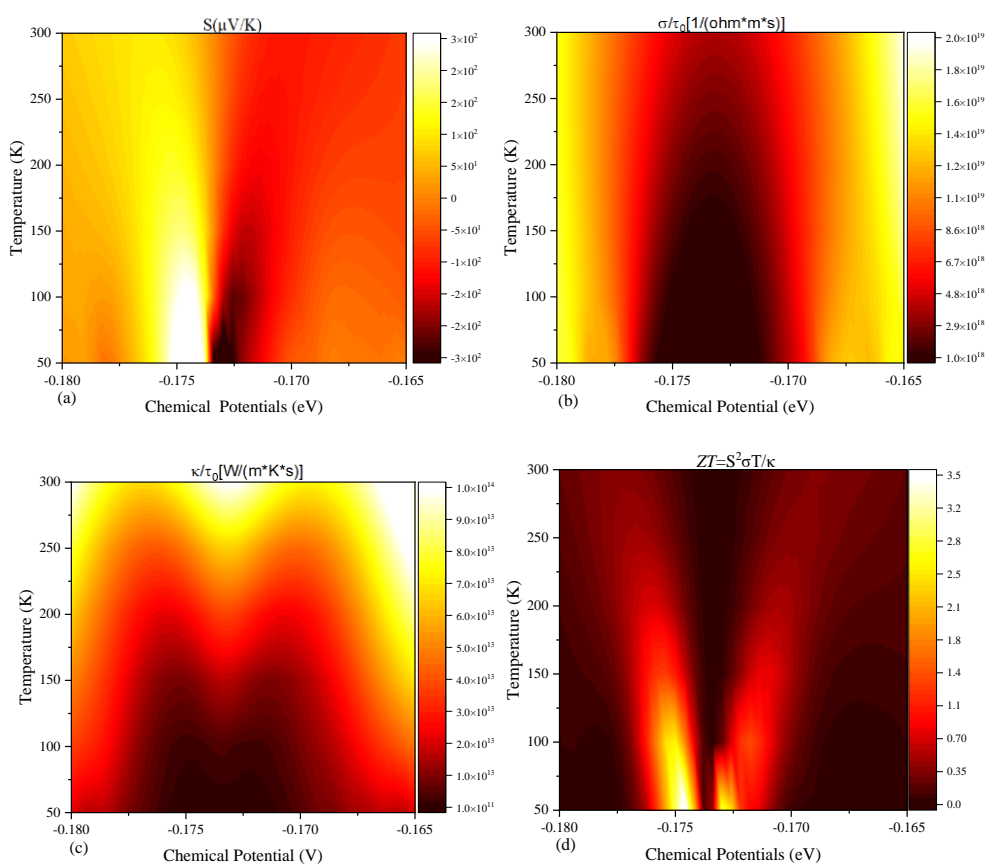

**Fig. S1** Chemical potential dependent (a)Seebeck coefficient, (b)electrical conductivity, (c)thermal conductivity, and (d)thermoelectric effect of no twist bilayer borophene.<sup>45</sup>
